# Supplementary material for: Aerosol Characteristics in the Entrainment Interface Layer In Relation to the Marine Boundary Layer and Free Troposphere
Source: Copernicus journal article supplement (doi:10.5194/acp-2017-913), 2017-10-06
Supplement: Supplementary file [file acp-2017-913-RC1-supplement.pdf]

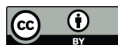

1 **Aerosol Characteristics in the Entrainment Interface Layer In Relation to the Marine**  
2 **Boundary Layer and Free Troposphere**

3

4 Hossein Dadashazar<sup>1</sup>, Rachel A. Braun<sup>1</sup>, Ewan Crosbie<sup>2,3</sup>, Patrick Y. Chuang<sup>4</sup>, Roy K. Woods<sup>5</sup>,  
5 Haflidi H. Jonsson<sup>5</sup>, Armin Sorooshian<sup>1,6</sup>

6

7

8 <sup>1</sup>Department of Chemical and Environmental Engineering, University of Arizona, Tucson, AZ,  
9 USA

10 <sup>2</sup>Science Systems and Applications, Inc., Hampton, VA, USA

11 <sup>3</sup>NASA Langley Research Center, Hampton, VA, USA

12 <sup>4</sup>Earth and Planetary Sciences, University of California-Santa Cruz, Santa Cruz, CA, USA

13 <sup>5</sup>Naval Postgraduate School, Monterey, CA, USA

14 <sup>6</sup>Department of Hydrology and Atmospheric Sciences, University of Arizona, Tucson, AZ, USA

15

16

17 *Correspondence to:* Armin Sorooshian (armin@email.arizona.edu)

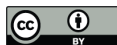

18 **Abstract.** This study uses airborne data from two field campaigns off the California coast to  
19 characterize aerosol size distribution characteristics in the entrainment interface layer (EIL), a  
20 thin and turbulent layer above marine stratocumulus cloud tops, that separates the stratocumulus-  
21 topped boundary layer (STBL) from the free troposphere (FT). The vertical bounds of the EIL  
22 are defined in this work based on considerations of buoyancy and turbulence using  
23 thermodynamic and dynamic data. Aerosol number concentrations are examined from three  
24 different probes with varying particle diameter ( $D_p$ ) ranges:  $> 3$  nm,  $> 10$  nm,  $0.11 - 3.4$   $\mu\text{m}$ .  
25 Relative to the EIL and FT layers, the sub-cloud (SUB) layer exhibited lower aerosol number  
26 concentrations and higher surface area concentrations. High particle number concentrations  
27 between 3 and 10 nm in the EIL is indicative of enhanced nucleation, assisted by high actinic  
28 fluxes, cool and moist air, and much lower surface area concentrations than the STBL. Slopes of  
29 number concentration versus altitude in the EIL were correlated with the particle number  
30 concentration difference between the SUB and lower FT layers. The EIL aerosol size distribution  
31 was influenced by varying degrees from STBL aerosol versus subsiding FT aerosol depending  
32 on the case examined. These results emphasize the important role of the EIL in influencing  
33 nucleation and aerosol-cloud-climate interactions.

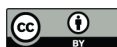

## 34 1. Introduction

35 Stratocumulus clouds are extensively studied because they are both the dominant cloud  
36 type by global area (Warren et al., 1986), covering approximately a fifth of the planet's surface  
37 area on an annual basis (Wood, 2012), and they play an important role in the planet's energy  
38 balance due to their impact on planetary albedo. The layer separating the stratocumulus-topped  
39 boundary layer (STBL) from the free troposphere (FT) aloft is usually tens of meters in vertical  
40 extent and referred to as the entrainment interface layer (EIL) (Caughey et al., 1982; Nicholls  
41 and Turton, 1986; Wang and Albrecht, 1994; Lenschow et al., 2000). This layer exhibits strong  
42 gradients in thermodynamic and dynamic properties. Although numerous airborne and modeling  
43 studies have attempted to increase our understanding about the thermodynamic and dynamic  
44 nature of the EIL (e.g., Caughey et al., 1982; Moeng et al., 2005; Haman et al., 2007; Wang et  
45 al., 2008; Carman et al., 2012; Katzwinkel et al., 2012; Gerber et al., 2013; Malinowski et al.,  
46 2013; Plante et al., 2016), aerosol characteristics in this thin layer have not been studied in detail.

47 The nature of the aerosol layer immediately above cloud top is important to understand  
48 because particles impact cloud microphysics and also because clouds vertically redistribute  
49 particles, remove them via droplet coalescence, and transform their properties through aqueous  
50 reactions. A modeling study showed that aerosol entrainment from the FT can contribute up to  
51 between 69-89% of particle number concentrations in the marine boundary layer (Katoshevski et  
52 al., 1999), and field measurements have confirmed the importance of entrainment in shaping the  
53 marine boundary layer aerosol budget (e.g., Clarke et al., 1998). The effects of above-cloud  
54 aerosol particles on clouds depend on the physicochemical properties of particles, their vertical  
55 distance from cloud top, and the dynamic and thermodynamic conditions around cloud top.  
56 Particles closest to the cloud top can entrain into the cloud and change the number concentration  
57 and size distribution of droplets (Costantino and Breón, 2010). On the other hand, an aerosol  
58 layer more detached from the cloud top and higher aloft can potentially alter the thermodynamic  
59 and dynamic structure of the layer below it, such as with absorbing smoke layers that can lead to  
60 stabilization and weaker cloud top long wave radiative cooling. This could in turn reduce  
61 cloudiness and cloud radiative forcing (Yamaguchi et al., 2015).

62 The goal of this study is to examine vertically-resolved aircraft data in the marine  
63 atmosphere off the California coast to characterize aerosol characteristics as a function of  
64 altitude, with a focus on the EIL. The results provide insight into the degree of similarity  
65 between the aerosol size distribution in the EIL relative to the STBL and FT. The results  
66 motivate additional attention to the EIL in terms of acting as an intermediate layer between the  
67 STBL and FT, in which there is some combination of cloud-processed aerosol and FT aerosol, in  
68 addition to new particle formation.

## 70 2. Experimental Methods

71 Aircraft data from the Center for Interdisciplinary Remotely-Piloted Aircraft Studies  
72 (CIRPAS) Twin Otter are analyzed from the Nucleation in California Experiment (NiCE, 2013)  
73 and the Fog and Stratocumulus Evolution Experiment (FASE, 2016), both of which took place  
74 between July and August. The flights examined here typically lasted four hours and included  
75 vertical characterization of marine aerosol ranging from near the ocean surface (~ 50 m ASL) up  
76 to 2 km in altitude.

77 Navigational, dynamic, and thermodynamic data were obtained from standard instruments  
78 described in a number of previous studies (e.g., Crosbie et al., 2016; Wang et al., 2016; Dadashazar  
79 et al., 2017). Aerosol particle concentrations were measured using multiple condensation particle



80 counters (CPCs; TSI Inc.), specifically the CPC 3010 (particle diameter,  $D_p > 10$  nm) and ultrafine  
81 CPC (UFPCPC) 3025 ( $D_p > 3$  nm). The CPCs sampled downstream of a forward facing sub-  
82 isokinetic inlet, which samples aerosol below  $3.5 \mu\text{m}$  diameter with 100% efficiency (Hegg et al.,  
83 2005). Aerosol size distributions were obtained with a Passive Cavity Aerosol Spectrometer Probe  
84 (PCASP;  $D_p \sim 0.11 - 3.4 \mu\text{m}$ ; Particle Measuring Systems (PMS), Inc., modified by Droplet  
85 Measurement Technologies, Inc.). Data from the Forward Scattering Spectrometer Probe (FSSP;  
86  $D_p \sim 1.6 - 45 \mu\text{m}$ ; PMS, Inc., modified by Droplet Measurement Technologies, Inc.) were  
87 additionally used to quantify aerosol surface area concentrations for particle diameters exceeding  
88 the PCASP upper size limit. Vertically-resolved droplet size distributions from the Cloud Imaging  
89 Probe (CIP;  $D_p$ ; 25–1550  $\mu\text{m}$ ) were used to estimate columnar-mean drizzle rates in clouds  
90 according to documented relationships between drop size and fall velocity (e.g., Chen et al., 2012;  
91 Feingold et al., 2013; Dadashazar et al., 2017).

92 The PVM-100 probe (Gerber et al., 1994) provided measurements of liquid water content  
93 (LWC). A threshold LWC value of  $0.02 \text{ g m}^{-3}$  has been used extensively in the study region to  
94 identify the presence of clouds (Prabhakar et al., 2014), which was important during soundings  
95 to quantify cloud base and top heights. The presented analysis was conducted for cases when the  
96 cloud layer was coupled to the surface layer rather than also considering decoupled clouds. We  
97 follow the methods employed in Wang et al. (2016) to distinguish between the two types of  
98 clouds based on discontinuities in thermodynamic variables from vertical sounding data.

99

### 100 3. Results and Discussion

#### 101 3.1 Layer Definitions

102 A total of 17 spiral soundings were analyzed from FASE and NiCE, with their locations  
103 shown in Figure 1. The ranges of cloud base heights and tops were 129–403 m and 375–729 m,  
104 respectively, for these soundings. Three vertical layers were defined with respect to the cloud  
105 layer including the sub-cloud (SUB) layer, the entrainment interface layer (EIL), and the FT. The  
106 vertical bounds of the EIL are defined based on considerations of buoyancy and turbulence,  
107 similar to past studies (Carman et al., 2012). An example from FASE Research Flight 7 (F07) on  
108 1 August 2016 illustrates the criteria used to determine the vertical boundaries of the EIL, STBL,  
109 and FT (Figure 2). While some studies extend the EIL into the cloud layer (Malinowski et al.,  
110 2013; Plante et al., 2016), this work defines the base of the EIL at cloud top (i.e., uppermost  
111 height where  $\text{LWC} \geq 0.02 \text{ g m}^{-3}$ ) for practical reasons since aerosol data from the PCASP and  
112 CPCs are not meaningful in the cloud layer. The top of the EIL is not as well-defined as its base  
113 due to weaker vertical gradients of dynamic and thermodynamic properties relaxing to FT values  
114 over tens of meters at times (Wood, 2012). A method similar to that of Malinowski et al. (2013)  
115 is applied, where the top of the EIL is taken to be the highest point where turbulent kinetic  
116 energy (TKE) and the variance of potential temperature ( $\theta$ ) simultaneously exceed  $0.1 \text{ m}^2 \text{ s}^{-2}$  and  
117 10% of maximum variance, respectively. This location is identified based on the smoothed  
118 moving variance and average of 75 points of 10 Hz data used to calculate both the  $\theta$  variance and  
119 TKE for spiral soundings. Considering an ascent rate of  $\sim 1.5 \text{ m s}^{-1}$ , 75 points corresponds to a  
120 vertical distance of  $\sim 10$  m. Based on the aforementioned criteria, the average ( $\pm$  standard  
121 deviation) EIL thickness was  $30 \pm 15$  m, with a minimum of 10 m and a maximum of 70 m  
122 (Table 1).

123 The FT base is considered to be at the EIL top, while the STBL top marks the EIL base.  
124 The FT layer extends up to 400 m above the EIL top for most cases except for five spirals that  
125 only reached  $\sim 100$  m above the EIL top (i.e., F10-1, F12-2, F14-1, F14-2, F16). In order to have



126 a more detailed analysis, the FT is further stratified into 100 m thick layers for the 12 spirals that  
127 afforded such data: FT1 = first 100 m increment above EIL top, FT2 = the 100 m increment  
128 above FT1, and so forth.

129

### 130 3.2 Cumulative Vertical Profiles

131 Table 1 compares particle concentration measurements from the PCASP and CPCs  
132 between the FT, EIL, and SUB layers. CPC concentrations were highest in the EIL for eight of  
133 the 17 soundings, with the remaining nine cases exhibiting peak values in the FT. With  
134 ascending altitude, average CPC concentrations were as follows:  $465 \pm 282 \text{ cm}^{-3}$  (SUB),  $1052 \pm$   
135  $390 \text{ cm}^{-3}$  (EIL),  $1036 \pm 612 \text{ cm}^{-3}$  (FT). When considering UFCPC data (i.e., smaller minimum  $D_p$   
136 than CPC), additional cases exhibited peak number concentrations in the EIL (10 of 17), with the  
137 remaining seven cases showing peak values in the FT. UFCPC number concentrations peaked in  
138 the EIL ( $1400 \pm 534 \text{ cm}^{-3}$ ) and FT ( $1296 \pm 705 \text{ cm}^{-3}$ ), with the SUB layer again exhibiting the  
139 lowest values ( $530 \pm 336 \text{ cm}^{-3}$ ). PCASP data revealed a different vertical trend than the UFCPC  
140 and CPC in that several cases exhibited peak concentrations in the SUB layer (5 of 17), with the  
141 most cases exhibiting the highest values in the FT (7 of 17). Average PCASP concentrations  
142 were as follows in each layer:  $156 \pm 65 \text{ cm}^{-3}$  (SUB),  $224 \pm 107 \text{ cm}^{-3}$  (EIL),  $227 \pm 120 \text{ cm}^{-3}$  (FT).  
143 Relative to the SUB layer, the larger standard deviation of particle concentrations from the three  
144 instruments (i.e., PCASP, CPC, UFCPC) in the FT layer for each **flight** is most likely owing  
145 to weaker vertical mixing, which promotes a non-homogeneous vertical distribution of aerosol in  
146 the FT.

147

### 148 3.3 Nucleation in the EIL

149 Discussion in the previous section about differences between the UFCPC and CPC results  
150 suggests that new particle formation is a common occurrence in the EIL. Otherwise, it is difficult  
151 to explain the enhancements in particle concentrations with  $D_p$  between 3 and 10 nm (deduced  
152 from the difference between UFCPC and CPC concentrations). Eleven of the 17 cases exhibited  
153 their peak ratio of UFCPC:CPC in the EIL, with the remaining six cases split evenly between  
154 peak ratios in the SUB and FT layers. Average UFCPC:CPC concentration ratios were as follows  
155 in each layer:  $1.16 \pm 0.04$  (SUB),  $1.34 \pm 0.23$  (EIL),  $1.18 \pm 0.10$  (FT). The difference in the  
156 means between the EIL and either of the other two layers is statistically significant with 95%  
157 confidence based on a two-tailed  $t$  test. The difference between the SUB and FT layers is  
158 insignificant.

159 To further examine differences in the aerosol size distribution in different vertical layers,  
160 Figure 3 shows average number concentrations of particles in three  $D_p$  ranges: 3-10 nm (UFCPC-  
161 CPC), 10-110 nm (CPC-PCASP), 110-3400 nm (PCASP). Regardless of the  $D_p$  range, the SUB  
162 layer exhibited the lowest average number concentration relative to the other layers. When  
163 considering each vertical layer, the  $D_p$  range exhibiting the highest number concentration was  
164 10-110 nm. The highest number concentrations of particles with  $D_p < 110 \text{ nm}$  were observed in  
165 the EIL, FT1, and FT2 layers. Number concentrations with  $D_p$  between 3 and 10 nm were  
166 highest in EIL ( $350 \pm 220$ ) relative to the other vertical layers with statistically significant  
167 differences (at 95% confidence) when compared to the SUB, FT3, and FT4 layers. The highest  
168 number concentration of particles with  $D_p$  between 10 and 110 nm was observed in the FT2 and  
169 FT3 layers, with likely influence from transported emissions of continentally-derived secondarily  
170 produced aerosol (e.g., Hersey et al., 2009; Coggon et al., 2014) and growth of new particles  
171 from the EIL and lower FT.



172 Factors promoting nucleation include cool and moist air and low particle surface area  
173 concentrations (e.g., Kerminen and Wexler, 1996; Pirjola et al., 1998, Clarke et al., 1999, Alam  
174 et al., 2003). Figure 4 shows mean values for these parameters in each vertical. Surface area (SA)  
175 concentration was quantified separately for particles with  $D_p$  between 0.11 and 3.4  $\mu\text{m}$  and for  
176  $D_p > 3.4 \mu\text{m}$  using PCASP and FSSP probes, respectively. Although not measured, actinic fluxes  
177 immediately above cloud top in the EIL are enhanced, which contributes to the likelihood of  
178 nucleation owing to increased production of OH by more than a factor of two (Mauldin et al.,  
179 1999). Temperature and specific humidity expectedly increase and decrease, respectively, with  
180 altitude from the SUB layer up to the FT4 layer. Drier and warmer air in the FT is less favorable  
181 for nucleation as compared to the EIL. The highest SA concentrations were expectedly observed  
182 in the SUB layer owing to sea spray emissions. The sharp reduction of SA concentration between  
183 the SUB and EIL layers is driven by scavenging of aerosol within the cloud. Although average  
184 SA concentration, when integrating PCASP and FSSP data together (i.e.,  $D_p$  between 0.11 – 45  
185  $\mu\text{m}$ ), decreased with altitude above cloud top, the EIL value ( $54.7 \pm 31.8 \mu\text{m}^2 \text{cm}^{-3}$ ) was still  
186 much lower relative to the SUB layer ( $314.8 \pm 301.6 \mu\text{m}^2 \text{cm}^{-3}$ ), and only 42% higher than that in  
187 FT3 ( $38.4 \pm 24.8 \mu\text{m}^2 \text{cm}^{-3}$ ), which exhibited the lowest value of any layer. The  $D_p$  range driving  
188 the changes in SA concentration between each layer was between 3.4 and 45  $\mu\text{m}$  (0.2 – 266.8  
189  $\mu\text{m}^2 \text{cm}^{-3}$ ) since Figure 4 shows much less variability for SA concentration of particles with  $D_p$   
190 between 0.11 and 3.4  $\mu\text{m}$  ( $38.1 - 48.1 \mu\text{m}^2 \text{cm}^{-3}$ ).

191 As it could be argued that the SA concentration in the EIL was still not very low in an  
192 absolute sense and exceeded values in layers above it, it is important to put the results in the  
193 context of other studies. Nucleation events adjacent to marine clouds have been recorded to  
194 occur for SA concentrations below  $2 \mu\text{m}^2 \text{cm}^{-3}$  in at least one study (Perry and Hobbs, 1995).  
195 Clarke et al. (1998) observed nucleation in cloud outflow regions when SA concentrations  
196 approached or dropped below  $\sim 5\text{--}10 \mu\text{m}^2 \text{cm}^{-3}$ . However, recent work shows that increased  
197 aerosol loadings suppress nucleation in the boundary layer but enhance it in the lower FT owing  
198 to a chain of aerosol-radiation-photochemistry interactions (Quan et al., 2017). Nucleation events  
199 in Birmingham, United Kingdom occurred for SA concentrations up to  $300 \mu\text{m}^2 \text{cm}^{-3}$ , but with  
200 most events below  $100 \mu\text{m}^2 \text{cm}^{-3}$  (Alam et al., 2003). Field measurements in Beijing, China  
201 suggested that  $200 \mu\text{m}^2 \text{cm}^{-3}$  served as a threshold surface area concentration below which  
202 nucleation occurred (Cai et al., 2017). The total SA concentration in the EIL between 0.11–45  
203  $\mu\text{m}$  in the present study was far lower than that threshold and are below the upper limit of what  
204 was observed in Birmingham (Figure 4). With regard to emissions sources that could promote  
205 nucleation in the study region, major ones include shipping (e.g.,  $\text{SO}_2$ ; Coggon et al., 2012),  
206 marine biogenic emissions (e.g., dimethylsulfide, amines; Sorooshian et al., 2009, 2015; Youn et  
207 al., 2015), and continental emissions (e.g.,  $\text{NH}_3$ , volatile organic compounds; Braun et al., 2017).

208 The combination of cool and moist air, high actinic solar fluxes, relatively low surface  
209 area concentrations as compared to other studies with nucleation events (e.g., Alam et al., 2003;  
210 Cai et al., 2017), and several precursor vapor sources builds a case for why nucleation resulted in  
211 the highest number concentration of particles with  $D_p = 3\text{--}10 \text{ nm}$  in the EIL relative to other  
212 vertical layers. This result is consistent with previous studies showing that enhanced layers of  
213 new particles in FT generally are near cloud top heights (e.g., Clarke et al., 1998, Clarke et al.,  
214 1999). The significance of nucleation in the EIL is that these particles impact the transfer of solar  
215 radiation owing to both directly scattering light and contributing to the marine atmosphere's  
216 cloud condensation nuclei (CCN) budget after growth to sufficiently large sizes.

217



### 218 3.4 STBL and FT Influences on the EIL

219 The vertical profile of aerosol number concentrations in the EIL provides insight into the  
220 level of influence between adjacent vertical layers (i.e., STBL and FT). Thirteen of the 17 spirals  
221 examined exhibited an increasing trend of PCASP concentration as a function of altitude in the  
222 EIL layer (Figure 5). Almost all of the cases (16 of 17) exhibited a positive trend for CPC  
223 concentration with altitude (Figure 6). Although not shown, owing to its similarity to CPC data,  
224 UFCPC concentrations exhibited a positive trend for 16 cases too. F08 exhibited an overall  
225 decrease in CPC concentration with EIL altitude; however, concentrations initially exhibited an  
226 increase in the bottom half of the EIL before decreasing. F07 was marked by the highest slope,  
227 based on CPC concentrations, and it exhibited the thinnest EIL, which demonstrates the  
228 sensitivity of the slopes to EIL thickness.

229 The slopes of the number concentrations versus altitude in the EIL presumably insight  
230 into the relative differences between SUB and lower FT aerosol number concentrations. In other  
231 words, a positive slope likely suggests that the lower FT is more polluted as compared to the  
232 SUB layer. Figure 7 relates the number concentration slopes in the EIL for the PCASP and CPC  
233 as a function of the number concentration difference between the FT1 and the SUB layer. The x-  
234 axis is normalized by the EIL depth to account for reduced slopes when EIL depth is high. There  
235 is a strong positive relationship for both PCASP and CPC data, supporting the notion that the  
236 EIL acts as a layer with properties intermediate to those in the STBL and FT. In other words, the  
237 aerosol gradient in the EIL is maintained by the relative difference of aerosol characteristics  
238 between STBL and lower FT layers.

239 An interesting feature of the cases with lower number concentrations in the SUB layer is  
240 that they tended to be concurrent with thicker clouds. Figure 8 shows particle concentrations in  
241 the SUB layer for the 17 cases divided in two different categories (thin and thick clouds) using  
242 the median cloud thickness (333 m) as a dividing threshold value. The number concentration  
243 means for  $D_p$  between 3-10 nm and 10-110 nm were significantly different (and lower) for thick  
244 clouds as compared to thin clouds. This is suggestive of enhanced scavenging (both below cloud  
245 and in-cloud scavenging) of particles in comparison to thinner clouds. This is supported by  
246 columnar-mean drizzle rates for the thick clouds exceeding those for thin clouds:  $3.2 \pm 2.2$  mm  
247  $\text{day}^{-1}$  versus  $0.4 \pm 0.4$  mm  $\text{day}^{-1}$ . A peculiar result is that there was no statistically significant  
248 difference in the number concentration for larger particles, which are the ones most likely to  
249 activate into cloud droplets and be associated with drizzle drops. Although outside the scope of  
250 this study, a potential explanation that will be the subject of forthcoming work is that evaporation  
251 of drizzle drops in the SUB layer preserves the concentration of larger particles, while smaller  
252 particles are scavenged by drops.

### 254 3.5 Cloud-Processed Aerosol in the EIL

255 While some studies suggest that the EIL air has properties intermediate to the STBL and  
256 FT owing to detrainment of air from the STBL (Deardorff, 1980; Gerber et al., 2005), others  
257 have not found evidence for detrainment (Faloona et al., 2005; Kurowski et al., 2009). Also, the  
258 lowering of cloud top height via mechanisms such as evaporation or drop sedimentation can  
259 leave a layer of cloud-processed aerosol in the EIL (Sorooshian et al., 2007; Chen et al., 2012).  
260 As those studies were not focused on aerosol size distributions, here we address this issue using  
261 PCASP size distribution data. Three case studies (Figure 9) are used to show the range of  
262 conditions experienced with reference made to geometric mean diameters of specific PCASP  
263 size bins where number concentration modes were observed.



264 The N16 case exhibited a unimodal size distribution in the SUB layer with a peak near  
265 420 nm. In the FT, there was a clear peak at or below the minimum size limit of the PCASP (110  
266 nm). The EIL exhibited an intermediate aerosol size distribution with the peak at the lowest size,  
267 similar to the FT, and a peak at 420 nm, similar to the SUB layer. In addition, the number  
268 concentration was most enhanced in the EIL in comparison to the SUB and FT layers. The  
269 number concentration and shape of the size distribution above 315 nm was identical between the  
270 EIL and SUB layers. However, the number concentration below that size was most enhanced in  
271 the EIL, suggestive of accumulation of subsiding FT aerosol. Earlier work showed how  
272 subsiding FT aerosol can lead to thin layers of enriched organic acid aerosol concentrations  
273 above cloud tops in the study region (Sorooshian et al., 2007).

274 The F03-4 case exhibited behavior characteristic of the EIL being mainly influenced by  
275 the FT and not the SUB layer. The SUB aerosol size distribution was bimodal with peaks at 182  
276 and 223 nm. The FT aerosol exhibited a bimodal distribution but with peaks at smaller sizes,  
277 specifically 151 and 182 nm. The EIL showed the same bimodal structure as the FT, with the  
278 resemblance closest near the top of the EIL.

279 Finally, the F10-1 case exhibited behavior suggestive of higher influence from the SUB  
280 layer as compared to the FT. The SUB aerosol size distribution was bimodal similar to the  
281 previous case with peaks at 182 and 223 nm. These same peaks were present in the EIL, and the  
282 resemblance to the SUB size distribution was closest at the base of the EIL. The FT aerosol was  
283 unimodal with a peak at 182 nm.

284 These three cases illustrate that EIL aerosol size distributions exhibit characteristics of  
285 both the STBL and FT aerosol to varying degrees depending on the case examined. The slopes  
286 from Figure 5 are consistent with the aerosol size distribution relationships between the SUB,  
287 EIL, and FT layers. More specifically, the most significant, and highest slope, was for F03-4,  
288 which is the case where the EIL size distribution most clearly resembled that in the FT. Although  
289 still positive, the slope from N16 was weaker owing to the influence from both the STBL and  
290 FT. Finally, F10-1 exhibited a negative slope, consistent with the EIL size distribution most  
291 clearly resembling that in the SUB layer.

292

#### 293 4. Conclusions

294 This work examined 17 spiral soundings from research flights off the California coast  
295 with a focus on the aerosol characteristics of the EIL relative to the FT above it, and the STBL  
296 below it. The main results are as follows:

297

- 298 • Regardless of particle size range, the SUB layer exhibits the lowest average number  
299 concentrations relative to the EIL and FT. Thicker clouds were coincident with the lowest  
300 number concentrations in the SUB layer, especially for  $D_p$  between 3 and 110 nm.  
301 Conversely, the SUB layer exhibits the highest total aerosol surface area concentrations  
302 owing to sea spray emissions, with significantly lower values in the EIL and FT layers.
- 303 • The aerosol number concentration data provide evidence of nucleation in the EIL,  
304 coincident with factors that promote this mechanism including relatively low aerosol  
305 surface area, favorable meteorological conditions (cool and moist air), and high actinic  
306 fluxes.





- 307       • Vertical aerosol concentration gradients for PCASP and CPC number concentrations in  
308       the EIL are a good predictor as to the relative behavior of the aerosol size distribution  
309       between the SUB and FT layers.  
310       • Vertically-resolved aerosol size distribution data show that there can be signatures of  
311       cloud-processed air in the EIL.

312       The implications of this study are multi-fold with regard to research flight planning and  
313       the overall effects of aerosol on climate and clouds. More specifically, the results stress that  
314       airborne flights that attempt to characterize aerosol characteristics above stratocumulus clouds  
315       require caution in terms of how far above cloud tops flight patterns are conducted owing to  
316       differences that exist between the EIL and the FT. Careful attention to where the EIL is relative  
317       to the FT is recommended as the latter most clearly will represent aerosol conditions from  
318       sources other than those below cloud and the former will have the strongest signature of  
319       nucleation. Finally, the EIL often exhibits signatures of cloud-processed aerosol that are  
320       important to consider with regard to understanding cloud effects on aerosol.

321       *Data availability:* All data used in this work can be found on the Figshare database (Sorooshian  
322       et al., 2017; [https://figshare.com/articles/A\\_Multi-Year\\_Data\\_Set\\_on\\_Aerosol-Cloud-  
323       Precipitation-Meteorology\\_Interactions\\_for\\_Marine\\_Stratocumulus\\_Clouds/5099983](https://figshare.com/articles/A_Multi-Year_Data_Set_on_Aerosol-Cloud-Precipitation-Meteorology_Interactions_for_Marine_Stratocumulus_Clouds/5099983)).  
324

325       *Competing interests:* The authors declare that they have no conflict of interest.  
326

327       *Acknowledgements:* This work was funded by Office of Naval Research grants N00014-10-1-  
328       0811, N00014-11-1-0783, N00014-10-1-0200, N00014-04-1-0118, and N00014-16-1-2567.  
329

### 330       **References**

331       Alam, A., Shi, J. P., and Harrison, R. M.: Observations of new particle formation in urban air, *J.*  
332       *Geophys. Res.-Atmos.*, 108, 4093, doi:10.1029/2001jd001417, 2003.  
333

334       Braun, R. A., Dadashazar, H., MacDonald, A. B., Aldhaif, A. M., Maudlin, L. C., Crosbie, E.,  
335       Aghdam, M. A., Mardi, A. H., and Sorooshian, A.: Impact of Wildfire Emissions on Chloride  
336       and Bromide Depletion in Marine Aerosol Particles, *Environ. Sci. Technol.*, 51, 9013-9021,  
337       2017.  
338

339       Cai, R., Yang, D., Fu, Y., Wang, X., Li, X., Ma, Y., Hao, J., Zheng, J., and Jiang, J.: Aerosol  
340       Surface Area Concentration: a Governing Factor for New Particle Formation in Beijing, *Atmos.*  
341       *Chem. Phys. Discuss.*, doi:10.5194/acp-2017-467, in review, 2017.  
342

343       Carman, J. K., Rossiter, D. L., Khelif, D., Jonsson, H. H., Faloona, I. C., and Chuang, P. Y.:  
344       Observational constraints on entrainment and the entrainment interface layer in stratocumulus,  
345       *Atmos. Chem. Phys.*, 12, 11135-11152, doi:10.5194/acp-12-11135-2012, 2012.  
346

347       Caughey, S. J., Crease, B. A., and Roach, W. T.: A Field-Study of Nocturnal Stratocumulus .2.  
348       Turbulence Structure and Entrainment, *Q. J. Roy. Meteor. Soc.*, 108, 125-144,  
349       doi:10.1002/qj.49710845508, 1982.  
350



- 351 Chen, Y. C., Christensen, M. W., Xue, L., Sorooshian, A., Stephens, G. L., Rasmussen, R. M.,  
352 and Seinfeld, J. H.: Occurrence of lower cloud albedo in ship tracks, *Atmos. Chem. Phys.*, 12,  
353 8223-8235, doi:10.5194/acp-12-8223-2012, 2012.
- 354  
355 Clarke, A. D., Varner, J. L., Eisele, F., Mauldin, R. L., Tanner, D., and Litchy, M.: Particle  
356 production in the remote marine atmosphere: Cloud outflow and subsidence during ACE 1, *J.*  
357 *Res.-Atmos.*, 103, 16397-16409, doi:10.1029/97jd02987, 1998.
- 358  
359 Clarke, A. D., Kapustin, V. N., Eisele, F. L., Weber, R. J., and McMurry, P. H.: Particle  
360 production near marine clouds: Sulfuric acid and predictions from classical binary nucleation,  
361 *Geophys. Res. Lett.*, 26, 2425-2428, doi:10.1029/1999gl900438, 1999.
- 362  
363 Coggon, M. M., Sorooshian, A., Wang, Z., Metcalf, A. R., Frossard, A. A., Lin, J. J., Craven, J.  
364 S., Nenes, A., Jonsson, H. H., Russell, L. M., Flagan, R. C., and Seinfeld, J. H.: Ship impacts on  
365 the marine atmosphere: insights into the contribution of shipping emissions to the properties of  
366 marine aerosol and clouds, *Atmos. Chem. Phys.*, 12, 8439-8458, doi:10.5194/acp-12-8439-2012,  
367 2012.
- 368  
369 Coggon, M. M., Sorooshian, A., Wang, Z., Craven, J. S., Metcalf, A. R., Lin, J. J., Nenes, A.,  
370 Jonsson, H. H., Flagan, R. C., and Seinfeld, J. H.: Observations of continental biogenic impacts  
371 on marine aerosol and clouds off the coast of California, *J. Geophys. Res.-Atmos.*, 119, 6724-  
372 6748, doi:10.1002/2013JD021228, 2014.
- 373  
374 Costantino, L., and Breon, F. M.: Analysis of aerosol-cloud interaction from multi-sensor  
375 satellite observations, *Geophys. Res. Lett.*, 37, L11801, doi:10.1029/2009gl041828, 2010.
- 376  
377 Dadashazar, H., Wang, Z., Crosbie, E., Brunke, M., Zeng, X. B., Jonsson, H., Woods, R. K.,  
378 Flagan, R. C., Seinfeld, J. H., and Sorooshian, A.: Relationships between giant sea salt particles  
379 and clouds inferred from aircraft physicochemical data, *J. Geophys. Res.-Atmos.*, 122, 3421-  
380 3434, doi:10.1002/2016JD026019, 2017.
- 381  
382 Deardorff, J. W.: Stratocumulus-Capped Mixed Layers Derived from a 3-Dimensional Model,  
383 *Bound.-Lay. Meteorol.*, 18, 495-527, doi:10.1007/Bf00119502, 1980.
- 384  
385 Faloon, I., Lenschow, D. H., Campos, T., Stevens, B., van Zanten, M., Blomquist, B., Thornton,  
386 D., Bandy, A., and Gerber, H.: Observations of entrainment in eastern Pacific marine  
387 stratocumulus using three conserved scalars, *J. Atmos. Sci.*, 62, 3268-3285,  
388 doi:10.1175/Jas3541.1, 2005.
- 389  
390 Feingold, G., McComiskey, A., Rosenfeld, D., and Sorooshian, A.: On the relationship between  
391 cloud contact time and precipitation susceptibility to aerosol, *J. Geophys. Res.-Atmos.*, 118,  
392 10544-10554, doi:10.1002/jgrd.50819, 2013.
- 393  
394 Gerber, H., Arends, B. G., and Ackerman, A. S.: New microphysics sensor for aircraft use,  
395 *Atmos. Res.*, 31, 235-252, doi:10.1016/0169-8095(94)90001-9, 1994.
- 396



- 397 Gerber, H., Frick, G., Malinowski, S. P., Brenguier, J. L., and Burnet, F.: Holes and entrainment  
398 in stratocumulus, *J. Atmos. Sci.*, 62, 443-459, doi:10.1175/Jas-3399.1, 2005.  
399
- 400 Gerber, H., Frick, G., Malinowski, S. P., Jonsson, H., Khelif, D., and Krueger, S. K.:  
401 Entrainment rates and microphysics in POST stratocumulus, *J. Geophys. Res.-Atmos.*, 118,  
402 12094-12109, doi:10.1002/jgrd.50878, 2013.  
403
- 404 Haman, K. E., Malinowski, S. P., Kurowski, M. J., Gerber, H., and Brenguier, J. L.: Small scale  
405 mixing processes at the top of a marine stratocumulus - a case study, *Q. J. Roy. Meteor. Soc.*,  
406 133, 213-226, doi:10.1002/qj.5, 2007.  
407
- 408 Hegg, D. A., Covert, D. S., Jonsson, H., and Covert, P. A.: Determination of the transmission  
409 efficiency of an aircraft aerosol inlet, *Aerosol Sci. Tech.*, 39, 966-971,  
410 doi:10.1080/02786820500377814, 2005.  
411
- 412 Hersey, S. P., Sorooshian, A., Murphy, S. M., Flagan, R. C., and Seinfeld, J. H.: Aerosol  
413 hygroscopicity in the marine atmosphere: a closure study using high-time-resolution, multiple-  
414 RH DASH-SP and size-resolved C-ToF-AMS data, *Atmos. Chem. Phys.*, 9, 2543-2554,  
415 doi:10.5194/acp-9-2543-2009, 2009.  
416
- 417 Katoshevski, D., Nenes, A., and Seinfeld, J. H.: A study of processes that govern the  
418 maintenance of aerosols in the marine boundary layer, *J. Aerosol. Sci.*, 30, 503-532,  
419 doi:10.1016/S0021-8502(98)00740-X, 1999.  
420
- 421 Katzwinkel, J., Siebert, H., and Shaw, R. A.: Observation of a Self-Limiting, Shear-Induced  
422 Turbulent Inversion Layer Above Marine Stratocumulus, *Bound.-Lay. Meteorol.*, 145, 131-143,  
423 doi:10.1007/s10546-011-9683-4, 2012.  
424
- 425 Kerminen, V. M., and Wexler, A. S.: The occurrence of sulfuric acid-water nucleation in plumes:  
426 Urban environment, *Tellus B*, 48, 65-82, doi:10.1034/j.1600-0889.1996.00007.x, 1996.  
427
- 428 Kurowski, M. J., Malinowski, S. P., and Grabowski, W. W.: A numerical investigation of  
429 entrainment and transport within a stratocumulus-topped boundary layer, *Q. J. Roy. Meteor.*  
430 *Soc.*, 135, 77-92, doi:10.1002/qj.354, 2009.  
431
- 432 Lenschow, D. H., Zhou, M. Y., Zeng, X. B., Chen, L. S., and Xu, X. D.: Measurements of fine-  
433 scale structure at the top of Marine Stratocumulus, *Bound.-Lay. Meteorol.*, 97, 331-357, doi:  
434 10.1023/A:1002780019748, 2000.  
435
- 436 Malinowski, S. P., Gerber, H., Jen-La Plante, I., Kopec, M. K., Kumala, W., Nurowska, K.,  
437 Chuang, P. Y., Khelif, D., and Haman, K. E.: Physics of Stratocumulus Top (POST): turbulent  
438 mixing across capping inversion, *Atmos. Chem. Phys.*, 13, 12171-12186, doi:10.5194/acp-13-  
439 12171-2013, 2013.  
440
- 441 Maudlin, L. C., Wang, Z., Jonsson, H. H., and Sorooshian, A.: Impact of wildfires on size-  
442 resolved aerosol composition at a coastal California site, *Atmos. Environ.*, 119, 59-68, 2015.



- 443  
444 Mauldin, R. L., Tanner, D. J., Heath, J. A., Huebert, B. J., and Eisele, F. L.: Observations of  
445 H<sub>2</sub>SO<sub>4</sub> and MSA during PEM-Tropics-A, *J. Geophys. Res.-Atmos.*, 104, 5801-5816,  
446 doi:10.1029/98jd02612, 1999.  
447
- 448 Moeng, C. H., Stevens, B., and Sullivan, P. P.: Where is the interface of the stratocumulus-  
449 topped PBL?, *J. Atmos. Sci.*, 62, 2626-2631, doi:10.1175/Jas3470.1, 2005.  
450
- 451 Nicholls, S., and Turton, J. D.: An Observational Study of the Structure of Stratiform Cloud  
452 Sheets .2. Entrainment, *Q. J. Roy. Meteor. Soc.*, 112, 461-480, doi:10.1002/qj.49711247210,  
453 1986.  
454
- 455 Perry, K. D., and Hobbs, P. V.: Further Evidence for Particle Nucleation in Clean-Air Adjacent  
456 to Marine Cumulus Clouds, *J. Geophys. Res.-Atmos.*, 100, 18929-18929,  
457 doi: 10.1029/94JD01926, 1995.  
458
- 459 Pirjola, L., Kulmala, M., Wilck, M., Bischoff, A., Stratmann, F., and Otto, E.: Formation of  
460 sulphuric acid aerosols and cloud condensation nuclei: An expression for significant nucleation  
461 and model comparison, *J. Aerosol. Sci.*, 30, 1079-1094, doi:10.1016/S0021-8502(98)00776-9,  
462 1999.  
463
- 464 Prabhakar, G., Ervens, B., Wang, Z., Maudlin, L. C., Coggon, M. M., Jonsson, H. H., Seinfeld, J.  
465 H., and Sorooshian, A.: Sources of nitrate in stratocumulus cloud water: Airborne measurements  
466 during the 2011 E-PEACE and 2013 NiCE studies, *Atmos. Environ.*, 97, 166-173, 2014.  
467
- 468 Quan, J. N., Liu, Y. A., Liu, Q., Jia, X. C., Li, X., Gao, Y., Ding, D. P., Li, J., and Wang, Z. F.:  
469 Anthropogenic pollution elevates the peak height of new particle formation from planetary  
470 boundary layer to lower free troposphere, *Geophys. Res. Lett.*, 44, 7537-7543,  
471 doi: 10.1002/2017GL074553, 2017.  
472
- 473 Radke, L. F., Hobbs, P. V., and Eltgroth, M. W.: Scavenging of Aerosol-Particles by  
474 Precipitation, *J. Appl. Meteorol.*, 19, 715-722, doi:10.1175/1520-  
475 0450(1980)019<0715:Soapbp>2.0.Co;2, 1980.  
476
- 477 Sorooshian, A., Lu, M. L., Brechtel, F. J., Jonsson, H., Feingold, G., Flagan, R. C., and Seinfeld,  
478 J. H.: On the source of organic acid aerosol layers above clouds, *Environ. Sci. Technol.*, 41,  
479 4647-4654, doi:10.1021/es0630442, 2007.  
480
- 481 Sorooshian, A., Padro, L. T., Nenes, A., Feingold, G., McComiskey, A., Hersey, S. P., Gates, H.,  
482 Jonsson, H. H., Miller, S. D., Stephens, G. L., Flagan, R. C., and Seinfeld, J. H.: On the link  
483 between ocean biota emissions, aerosol, and maritime clouds: Airborne, ground, and satellite  
484 measurements off the coast of California, *Global Biogeochem. Cy.*, 23,  
485 doi:10.1029/2009GB003464, 2009.  
486
- 487 Sorooshian, A., Crosbie, E., Maudlin, L. C., Youn, J. S., Wang, Z., Shingler, T., Ortega, A. M.,  
488 Hersey, S., and Woods, R. K.: Surface and airborne measurements of organosulfur and

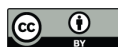

- 489 methanesulfonate over the western United States and coastal areas, *J. Geophys. Res.-Atmos.*,  
490 120, 8535-8548, 2015.  
491  
492 Sorooshian, A., et al.: A Multi-Year Data Set on Aerosol-Cloud-Precipitation-Meteorology  
493 Interactions for Marine Stratocumulus Clouds, Figshare, doi:10.6084/m9.figshare.5099983.v3,  
494 2017.  
495  
496 Wang, Q., and Albrecht, B. A.: Observations of Cloud-Top Entrainment in Marine  
497 Stratocumulus Clouds, *J. Atmos. Sci.*, 51, 1530-1547, doi:10.1175/1520-  
498 0469(1994)051<1530:Ooctei>2.0.Co;2, 1994.  
499  
500 Wang, S. P., Golaz, J. C., and Wang, Q.: Effect of intense wind shear across the inversion on  
501 stratocumulus clouds, *Geophys. Res. Lett.*, 35, L15814, doi:10.1029/2008gl033865, 2008.  
502  
503 Wang, Z., Sorooshian, A., Prabhakar, G., Coggon, M. M., and Jonsson, H. H.: Impact of  
504 emissions from shipping, land, and the ocean on stratocumulus cloud water elemental  
505 composition during the 2011 E-PEACE field campaign, *Atmos. Environ.*, 89, 570-580,  
506 doi:10.1016/j.atmosenv.2014.01.020, 2014.  
507  
517 Wang, Z., Ramirez, M. M., Dadashazar, H., MacDonald, A. B., Crosbie, E., Bates, K. H.,  
518 Coggon, M. M., Craven, J. S., Lynch, P., Campbell, J. R., Aghdam, M. A., Woods, R. K.,  
519 Jonsson, H., Flagan, R. C., Seinfeld, J. H., and Sorooshian, A.: Contrasting cloud composition  
520 between coupled and decoupled marine boundary layer clouds, *J. Geophys. Res.-Atmos.*, 121,  
521 11679-11691, doi:10.1002/2016JD025695, 2016.  
522  
523 Warren, S., Hahn, C. J., London, J., Chervin, R. M., and Jenne, R. L. (1986), Global distribution  
524 of total cloud cover and cloud types over land, NCAR Tech. Note NCAR/TN-273+STR, 29 pp. +  
525 200 maps, *Natl. Cent. Atmos. Res.*, Boulder, Colo.  
526  
527 Wood, R.: Stratocumulus Clouds, *Mon Weather Rev*, 140, 2373-2423, 10.1175/Mwr-D-11-  
528 00121.1, 2012.  
529  
530 Yamaguchi, T., Feingold, G., Kazil, J., and McComiskey, A.: Stratocumulus to cumulus  
531 transition in the presence of elevated smoke layers, *Geophys. Res. Lett.*, 42, 10478-10485,  
532 doi:10.1002/2015GL066544, 2015.  
533  
534 Youn, J. S., Crosbie, E., Maudlin, L. C., Wang, Z., and Sorooshian, A.: Dimethylamine as a  
535 major alkyl amine species in particles and cloud water: Observations in semi-arid and coastal  
536 regions, *Atmos. Environ.*, 122, 250-258, doi:10.1016/j.atmosenv.2015.09.061, 2015.  
537



538 **Table 1: Summary of EIL thickness (Thickness (base altitude, top altitude)), and particle concentrations (average (relative**  
 539 **standard deviation as a percentage)) for the sub-cloud layer (SUB), the entrainment interface layer (EIL), and the free**  
 540 **troposphere (FT). The cases are labeled with the campaign (F = FASE, N = NiCE), research flight number, and case number**  
 541 **(only for flights with more than one spiral) from that flight (i.e., ‘F12-2’ is the second spiral sounding case from FASE**  
 542 **Research Flight 12).**

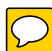

| Case  | EIL Thickness<br>(m) | PCASP (cm <sup>-3</sup> ) |          |          | CPC (cm <sup>-3</sup> ) |           |           | UFCPC (cm <sup>-3</sup> ) |           |           |
|-------|----------------------|---------------------------|----------|----------|-------------------------|-----------|-----------|---------------------------|-----------|-----------|
|       |                      | SUB                       | EIL      | FT       | SUB                     | EIL       | FT        | SUB                       | EIL       | FT        |
| F03-1 | 22 (692,714)         | 129 (20)                  | 273 (15) | 245 (47) | 186 (10)                | 1337 (16) | 1106 (38) | 232 (15)                  | 1542 (24) | 1382 (39) |
| F03-2 | 19 (729,748)         | 192 (15)                  | 428 (11) | 442 (54) | 300 (3)                 | 1259 (29) | 1499 (40) | 352 (8)                   | 1767 (22) | 1843 (42) |
| F03-3 | 27 (698,725)         | 199 (9)                   | 353 (32) | 258 (99) | 272 (2)                 | 868 (62)  | 919 (71)  | 324 (9)                   | 1437 (49) | 1254 (73) |
| F03-4 | 32 (700,732)         | 145 (17)                  | 326 (36) | 266 (70) | 185 (5)                 | 1553 (20) | 1023 (63) | 210 (67)                  | 1950 (30) | 1539 (64) |
| F07   | 10 (513,523)         | 268 (8)                   | 245 (15) | 275 (43) | 861 (1)                 | 1765 (50) | 2043 (20) | 991 (7)                   | 2615 (48) | 2407 (26) |
| F08   | 39 (375,414)         | 136 (11)                  | 109 (11) | 67 (49)  | 1010 (10)               | 1043 (8)  | 698 (23)  | 1207 (20)                 | 1220 (14) | 799 (27)  |
| F09-1 | 23 (412,435)         | 206 (7)                   | 170 (8)  | 189 (21) | 688 (1)                 | 1062 (15) | 1268 (19) | 837 (11)                  | 1296 (18) | 1444 (23) |
| F09-2 | 59 (403,462)         | 253 (7)                   | 205 (11) | 131 (27) | 999 (2)                 | 1353 (26) | 841 (28)  | 1169 (12)                 | 1619 (25) | 942 (30)  |
| F10-1 | 31 (637,668)         | 213 (17)                  | 206 (17) | 114 (18) | 355 (5)                 | 887 (27)  | 477 (26)  | 422 (8)                   | 1054 (22) | 543 (28)  |
| F10-2 | 28 (600,628)         | 166 (11)                  | 253 (29) | 138 (87) | 276 (2)                 | 833 (47)  | 455 (77)  | 315 (11)                  | 1137 (41) | 494 (80)  |
| F11   | 70 (707,777)         | 50 (26)                   | 171 (92) | 430 (25) | 194 (8)                 | 654 (74)  | 1212 (27) | 222 (10)                  | 806 (68)  | 1337 (30) |
| F12-1 | 28 (500,528)         | 181 (9)                   | 255 (12) | 374 (32) | 661 (3)                 | 804 (5)   | 782 (10)  | 789 (9)                   | 921 (8)   | 904 (14)  |
| F12-2 | 15 (444,459)         | 77 (12)                   | 54 (13)  | 35 (40)  | 357 (11)                | 334 (3)   | 433 (82)  | 402 (17)                  | 376 (5)   | 509 (122) |
| F14-1 | 24 (614,638)         | 57 (30)                   | 112 (39) | 338 (21) | 350 (4)                 | 1522 (31) | 2281 (5)  | 398 (8)                   | 2011 (30) | 2668 (6)  |
| F14-2 | 43 (525,568)         | 91 (15)                   | 87 (52)  | 166 (12) | 459 (17)                | 1308 (55) | 2402 (1)  | 490 (16)                  | 1707 (49) | 2660 (5)  |
| F16   | 33 (443,476)         | 103 (12)                  | 163 (43) | 236 (6)  | 185 (5)                 | 601 (69)  | 1222 (3)  | 209 (12)                  | 907 (52)  | 1403 (6)  |
| N16   | 15 (649,664)         | 183 (15)                  | 391 (12) | 155 (47) | 385 (3)                 | 703 (74)  | 657 (43)  | 433 (6)                   | 1441 (42) | 735 (38)  |

545

546

547

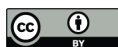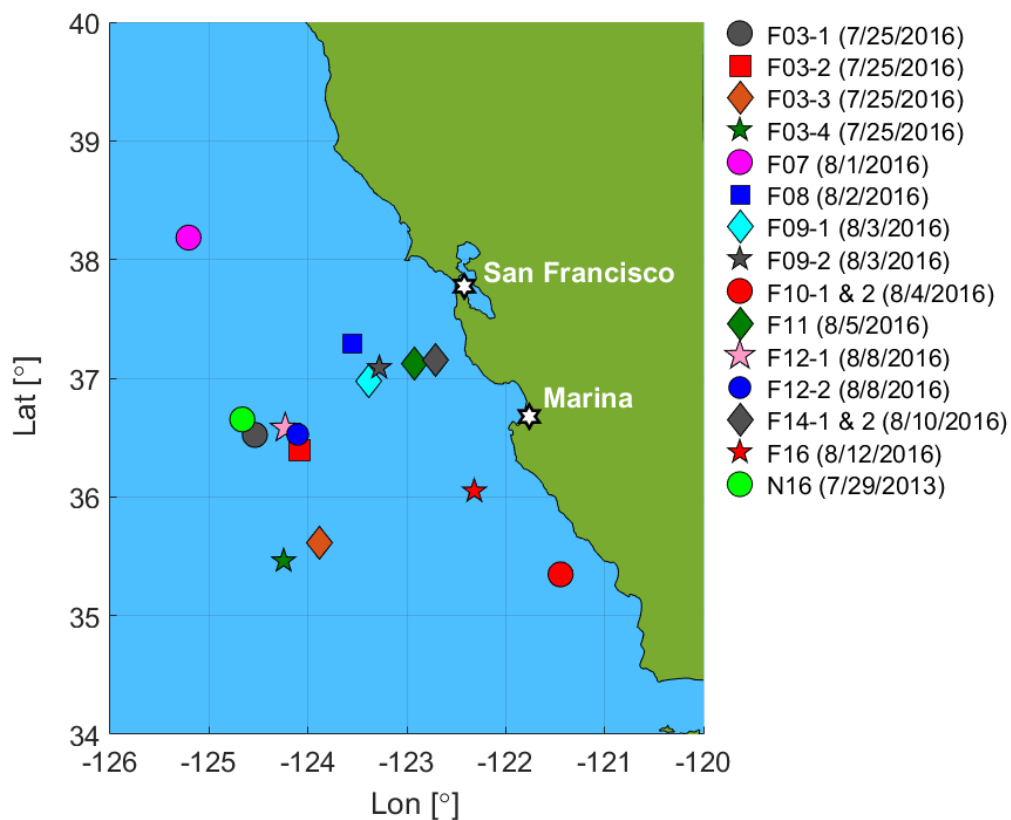

548

549

550 **Figure 1: Spatial map of spiral soundings examined in this study from the NiCE (2013) and**  
551 **FASE (2016) field campaigns. The cases are labeled with the campaign (F = FASE, N =**  
552 **NiCE), research flight number, and case number (only for flights with more than one**  
553 **spiral) from that flight (i.e., ‘F12-2’ is the second spiral sounding case from FASE Research**  
554 **Flight 12).**

555

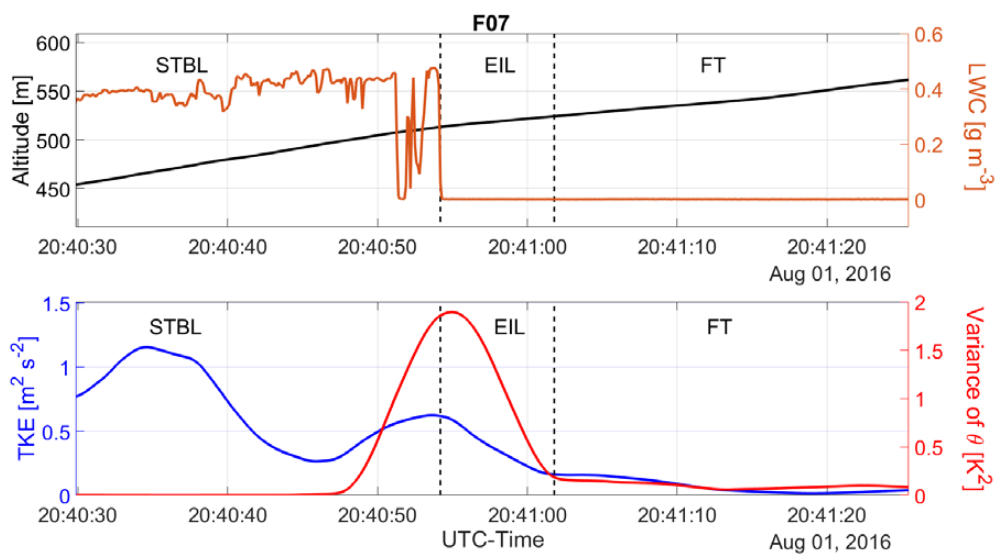

556

557 **Figure 2: F07 on 1 August 2016 showing how thermodynamic and dynamic criteria were**  
 558 **applied to define the vertical bounds of the EIL, which separates the STBL from the FT.**  
 559 **This subset of data is obtained from an upward spiral sounding.**

560





561

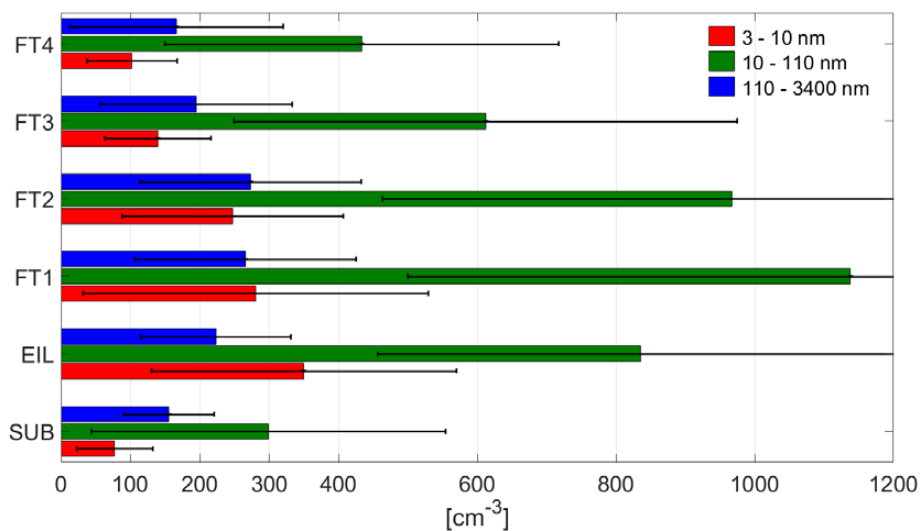

563  
564  
565  
566  
567

**Figure 3: Particle concentrations in different diameter ranges (3-10 nm, 10-110 nm, 110-3400 nm) for SUB, EIL, and FT vertical layers. The FT is divided into four layers based on 100 m increments above the EIL top. Whiskers represent one standard deviation.**



568

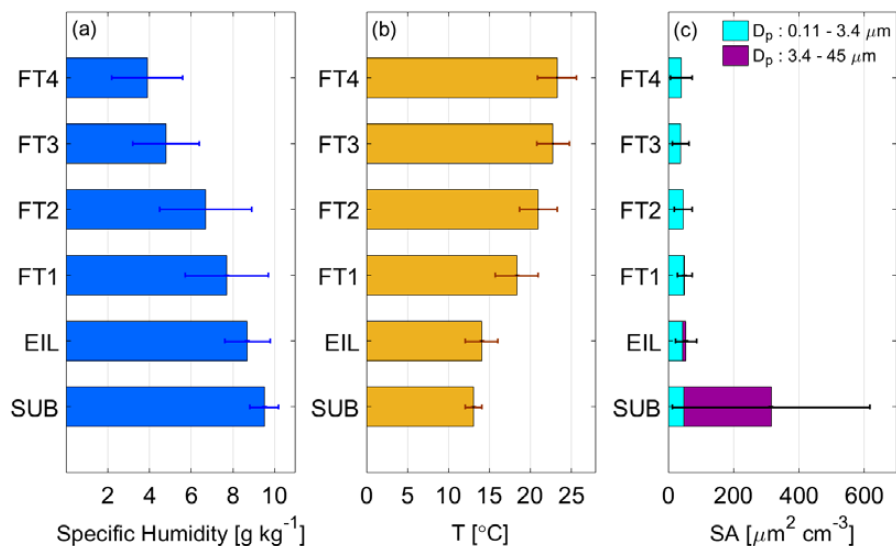

569

570 **Figure 4: (a) Specific humidity, (b) temperature, and (c) particle surface area (SA)**  
571 **concentrations for the SUB, EIL, and FT layers. The FT is divided into four layers based**  
572 **on 100 m increments above the EIL top. Particle SA concentrations are shown separately**  
573 **for the following diameter ranges: 0.11 - 3.4 μm, 3.4 - 45 μm. Whiskers represent one**  
574 **standard deviation.**

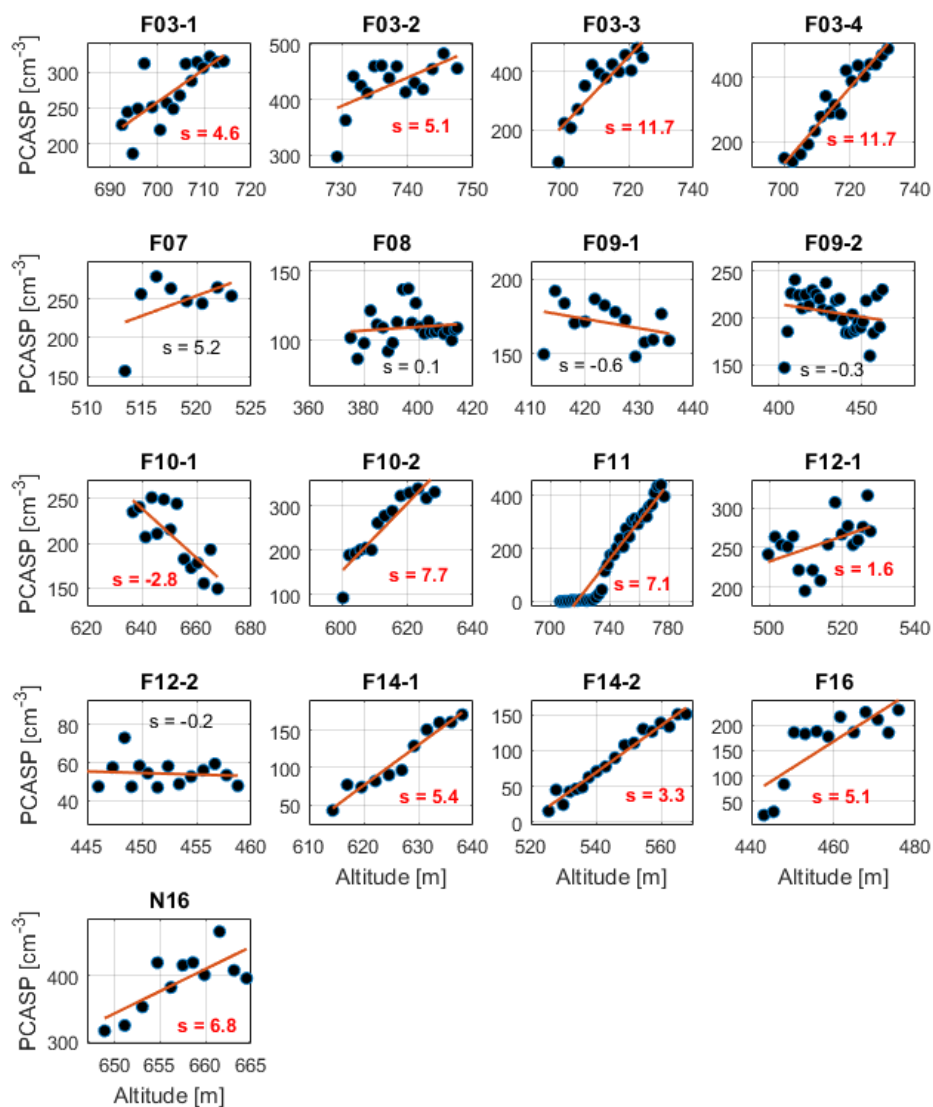

575  
576 **Figure 5: PCASP concentration as a function of altitude in the EIL. Linear fits and slopes**  
577 **(s, units of  $\text{cm}^{-3} \text{m}^{-1}$ ) are shown in each panel. Slopes in red font correspond to statistically**  
578 **significant correlations at 95% based on a two-tailed *t* test.**

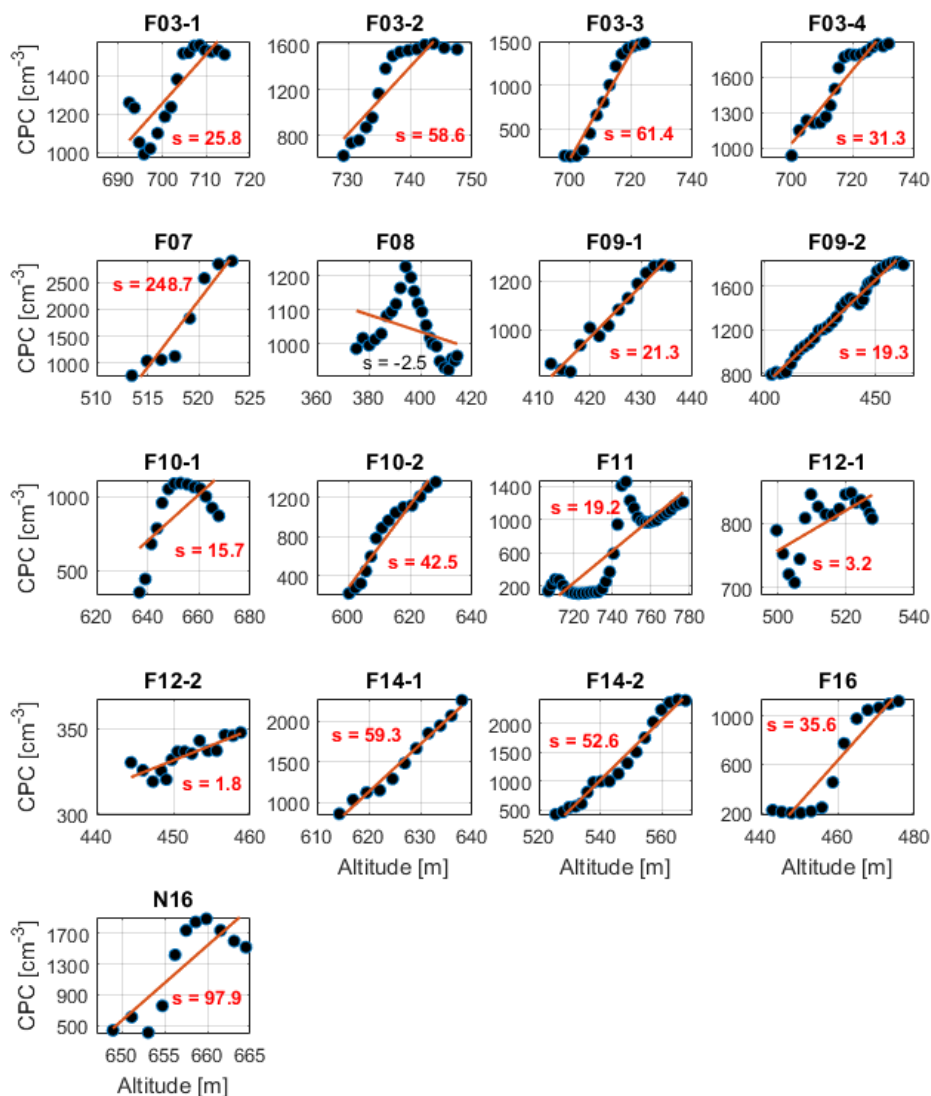

579  
580  
581  
582  
583

 **Figure 6:** CPC concentration as a function of altitude in EIL. Linear fits and slopes ( $s$ , units of  $\text{cm}^{-3} \text{m}^{-1}$ ) are shown in each panel. Slopes in red font correspond to statistically significant correlations at 95% based on a two-tailed  $t$  test.



584

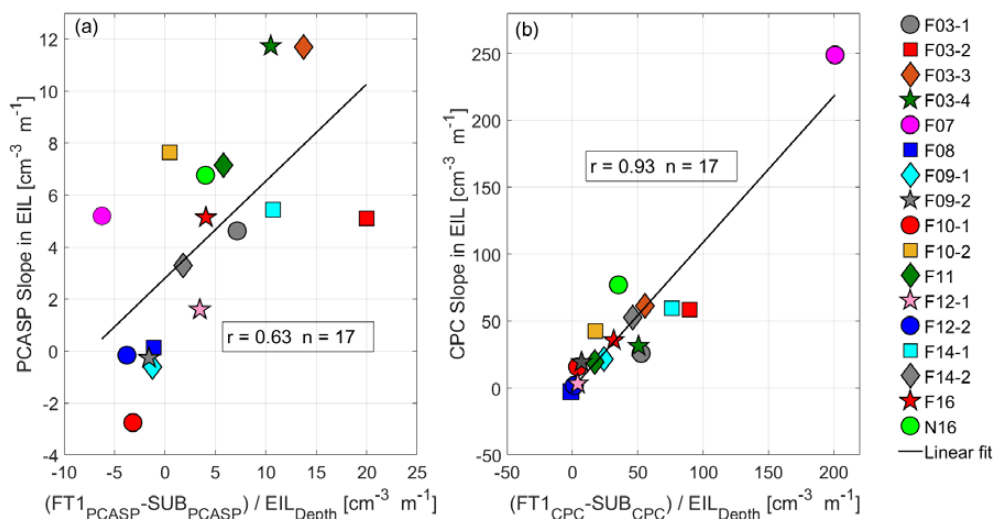

585  
 586  
 587  
 588  
 589  
 590  
 591

**Figure 7: Relationship between the slope of particle concentration gradients in EIL and concentration differences between the FT1 and SUB layers. Results are shown for the (a) PCASP and (b) CPC. The x-axis is normalized by the EIL depth to account for reduced slopes when the EIL is deeper.**

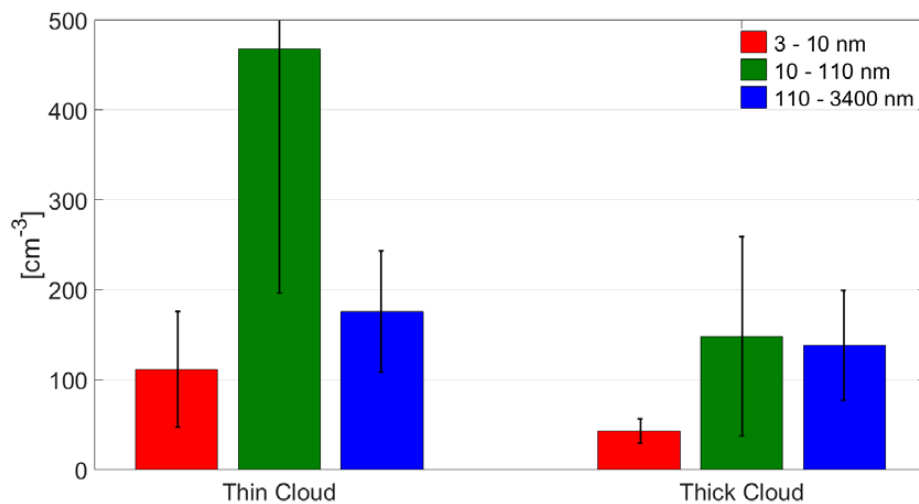

592

593

594

595

**Figure 8: Particle concentrations in different diameter ranges (3-10 nm, 10-110 nm, 110-3400 nm) in the sub-cloud (SUB) layer for thin (thickness < 333 m) and thick (thickness ≥ 333 m) clouds. Whiskers represent one standard deviation.**



596  
597

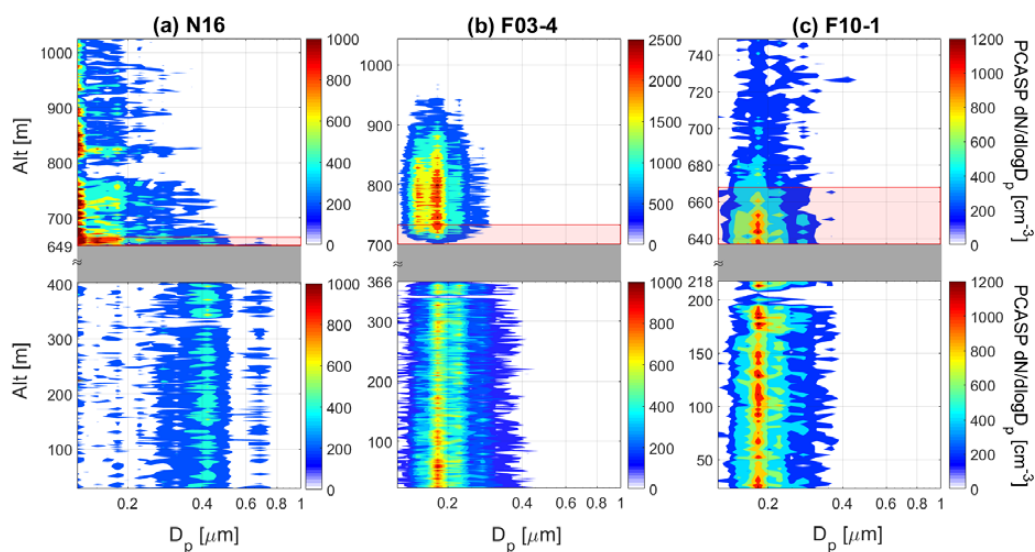

598  
599  
600  
601

**Figure 9: Vertically-resolved aerosol size distributions during spiral soundings on (a) N16, (b) F03-4, and (c) F10-1. The EIL and cloud layers are shaded in red and grey, respectively.**
